# Supplementary material
Source: Springer Nature journal article supplement (https://cris.unibo.it/retrieve/493546ff-c5aa-46af-9f05-12ebb25f5c7e/41997_2022_652_MOESM1_ESM.docx)
Supplement: MOESM1 [file 41997_2022_652_MOESM1_ESM.docx]

**Appendix A. Supplementary file**

**Search term**

“(((Active Breaks) OR (Classroom break) OR (Active class) OR (Brain break) OR (Classroom break) OR (Classroom movement break) OR (Movement break) OR (Lesson break) OR (Physically active lesson) OR (Active lesson)) AND ((Pre-adolescent) OR (Adolescent) OR (children) OR (Child)) AND ((Secondary School) OR (Secondary Schools) OR (Middle school)) AND ((Physical Activity) OR (Exercise) OR (Exercises) OR (Physical Activity) OR (Activities Physical) OR (Activity Physical) OR (Physical Activities) OR (Exercise Physical) OR (Exercises Physical) OR (Physical Exercise) OR (Physical Exercises)))”.
